# Supplementary material
Source: Springer Nature journal article supplement (https://www.springermedizin.de/resource/supplementary/12889_2010_2654_MOESM1_ESM.pdf/9486908)
Supplement: MOESM1 [file 9486908]

**Invited**  
(Total n=5865)  
Australia (n = 5046)  
Malaysia (n= 819)

**Agreed to participate**  
(Total n = 89, 2%)  
Australia (n = 41, 1%)  
Malaysia (n= 48, 6%)

**Returned completed questionnaires**  
(Total n = 34, 38%)  
Australia (n = 10, 24%)  
Malaysia (n= 24, 50%)

**Completed questionnaires included in the analysis**  
(Total n = 183)  
Australia (n = 58)  
Malaysia (n= 125)

**Failed to participate**  
(Total n = 55)

Stopped seeing pharmaceutical representatives  
(Australia, n = 4), (Malaysia, n = 0)

Pharmaceutical representatives refused to sign informed consent  
(Australia, n = 13), (Malaysia, n =8)

Unable to find time  
(Australia, n = 6), (Malaysia, n = 7)

Unknown reasons  
(Australia, n = 8), (Malaysia, n =9)

**Number of products discussed**  
(Total n = 129)  
Australia (n = 84)  
Malaysia (n= 45)
